# Supplementary material
Source: PubMed Central journal article supplement (PMC7549138)
Supplement: NIHMS1632728-supplement-Supplementary_Material.pdf [file NIHMS1632728-supplement-Supplementary_Material.pdf]

**TABLE****Supplemental Table 1.** Study Group Characteristics

| Variable                                    | Median or Percent | Interquartile Range |
|---------------------------------------------|-------------------|---------------------|
| <b>Demographic Data</b>                     |                   |                     |
| Age (years)                                 | 16.2              | 13.9 – 18.0         |
| Race                                        |                   |                     |
| • White or Caucasian                        | 95.8%             |                     |
| • African American                          | 4.2%              |                     |
| Insurance                                   |                   |                     |
| • Medicaid                                  | 10.8%             |                     |
| • Tricare                                   | 3.2%              |                     |
| • Private                                   | 86.0%             |                     |
| Duration of Diabetes (years)                | 6.9               | 4.9 – 9.6           |
| Duration of MiniMed 670G Usage (days)       | 188.5             | 89.0 – 446.0        |
| Prior Treatment Modality                    |                   |                     |
| • Multiple Daily Injections                 | 21.9%             |                     |
| • Insulin Pump                              | 78.1%             |                     |
| <b>Anthropomorphic Data</b>                 |                   |                     |
| Weight (kg)                                 | 67.6              | 54.0 – 77.8         |
| Height (cm)                                 | 166.0             | 158.7 – 171.4       |
| BMI (kg/m <sup>2</sup> )                    | 24.0              | 20.6 – 27.6         |
| <b>Laboratory Data</b>                      |                   |                     |
| Pre-Pump HbA1c (%)                          | 8.3               | 7.4 – 12.6          |
| Post-Pump HbA1c (%)                         | 7.6               | 7.1 – 8.6           |
| Delta HbA1c (%)                             | -0.4              | -1.1 – 0.2          |
| <b>Continuous Glucose Monitor Data</b>      |                   |                     |
| Time in Range, 70-180 mg/dL (%)             | 59.0              | 44.3 – 65.0         |
| Severe Hyperglycemic Time, >240 mg/dL (%)   | 12.5              | 6 – 21.8            |
| Hyperglycemic Time, 180-240 mg/dL (%)       | 25.0              | 20.3 – 31.8         |
| Hypoglycemic Time, 50-70 mg/dL (%)          | 2.0               | 1.0 – 3.0           |
| Severe Hypoglycemic Time, < 50 mg/dL (%)    | 0.0               | 0.0 – 1.0           |
| Mean CGM glucose (mg/dL)                    | 168.5             | 154.3 – 191.5       |
| Standard deviation CGM glucose (mg/dL)      | 62.0              | 55.0 – 76.5         |
| <b>Insulin Pump Data</b>                    |                   |                     |
| Auto Mode (%)                               | 38.5              | 0.0 – 64.0          |
| Manual Mode (%)                             | 61.0              | 35.3 – 100.0        |
| Sensor Wear Time (%)                        | 66.0              | 40.8 – 83.8         |
| Total daily dose (units)                    | 58.5              | 44.0 – 69.8         |
| Total daily dose per body weight (units/kg) | 0.85              | 0.73 – 1.03         |
| Percent bolus (%)                           | 54.0              | 47.2 – 61.0         |
| Number glucose checks per day               | 4.5               | 3.1 – 5.5           |
| Number of Meals                             | 4.0               | 2.8 – 5.4           |
| Carbohydrates per Day (grams)               | 187.5             | 144.0 – 247.3       |

**FIGURE**

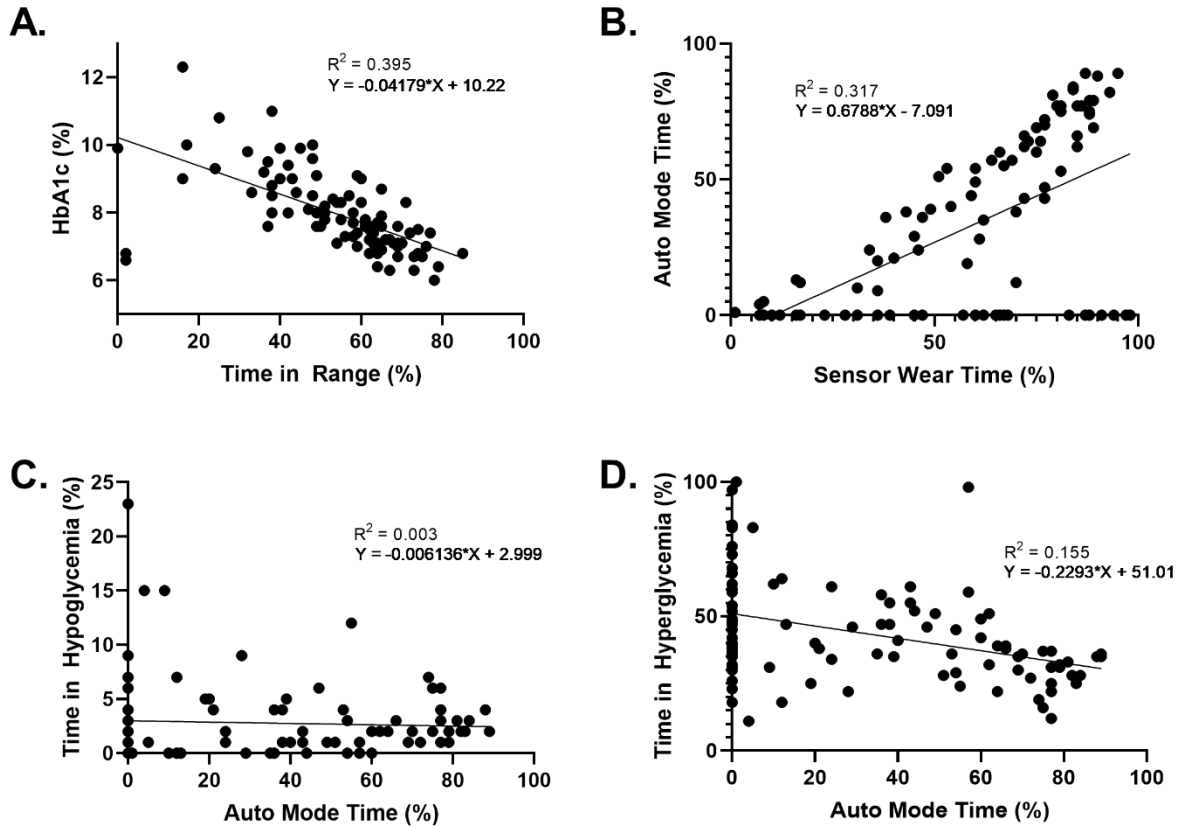

**Supplemental Figure 1. Bivariate Linear Regression.** *A:* Scatter plot depicting bivariate analysis of the correlation between TIR and HbA1c ( $p < 0.0001$ ). *B:* Scatter plot depicting bivariate analysis of the correlation between sensor wear time and Auto Mode time ( $p < 0.0001$ ). Patients with 100% sensor wear time but 0% Auto Mode time could fall into 2 categories: either (1) those who did not turn on the Auto Mode feature of the insulin pump or (2) those who have activated the Auto Mode feature but have never met Auto Mode readiness criteria. *C:* Scatter plot depicting bivariate analysis of the correlation between Auto Mode time and time in hypoglycemia ( $p = 0.28$ ). *D:* Scatter plot depicting bivariate analysis of the correlation between Auto Mode time and time in hyperglycemia ( $p < 0.0001$ ).
